# Supplementary material for: A general route to design solar thermoelectric generators under the constant heat flux thermal boundary
Source: Royal Society of Chemistry journal article supplement (doi:10.1039/d4ee04620j), 2025-01-01
Supplement: d4ee04620j1.pdf [file d4ee04620j1.pdf]

1  
2  
3  
4  
5  
6  
7  
8  
9  
10  
11  
12  
13  
14  
15  
16  
17  
18  
19  
20

## ***Supporting Information***

### **General Route to Design Solar Thermoelectric Generators under the Constant Heat Flux Thermal Boundary**

Huan Li<sup>1</sup>, Yupeng Wang<sup>1</sup>, Xinzhi Wu<sup>1</sup>, Kang Zhu<sup>2</sup>, Shuaihua Wang<sup>1</sup>, Mao Yu<sup>1</sup>, Weishu Liu<sup>1,\*</sup>

<sup>1</sup> Department of Materials Science and Engineering, Southern University of Science and Technology, Shenzhen, Guangdong 518055, China

<sup>2</sup> School of Advanced Energy, Sun Yat-sen University, Shenzhen, Guangdong 518107, China

\* Corresponding Author

ORCID iD: 0000-0001-8643-822X

Phone number: 0755-88018955

Email: liuws@sustech.edu.cn

Huan Li: 12132046@mail.sustech.edu.cn

Yupeng Wang: 12131019@mail.sustech.edu.cn

Xinzhi Wu: 12031208@mail.sustech.edu.cn

Kang Zhu: zhuk36@mail.sysu.edu.cn

Shuaihua Wang: 12132079@mail.sustech.edu.cn

Mao Yu: 12232090@mail.sustech.edu.cn

1 **Note S1. Derivation of the efficiency model for STEGs**

2 To facilitate the derivation of equations, we assumed that thermoelectric properties  
 3 are temperature-independent, and the Thomson coefficient becomes zero. Therefore,  
 4 according to the governing equation deduced in Liu's work<sup>1,2</sup> and boundary conditions,  
 5 the governing model for STEG is shown as follows

$$\begin{cases}
 \kappa \frac{d^2 T(x)}{dx^2} + \frac{I^2}{\sigma A^2} = 0 & (a) \\
 Q_h = ST(x)I - (A\kappa + A_i\kappa_i) \frac{dT}{dx} + \frac{T(x) - T_a}{R_h}, x = 0 & (b) \\
 ST(x)I - (A\kappa + A_i\kappa_i) \frac{dT}{dx} = \frac{T(x) - T_a}{R_c}, x = h & (c)
 \end{cases} \quad (S1)$$

7 where  $\kappa$  is the thermal conductivity,  $T$  is the temperature,  $x$  is the distance along the  
 8 thermoelectric leg,  $I$  is the current,  $\sigma$  is the electric conductivity,  $A$  is the area of the  
 9 thermoelectric leg,  $Q_h$  is the input heat,  $S$  is the Seebeck coefficient,  $A_i$  is the area of  
 10 insulation material,  $\kappa_i$  is the thermal conductivity of insulation material,  $T_a$  is the  
 11 ambient temperature,  $R_h$  is the hot-side thermal resistance,  $R_c$  is the cold-side thermal  
 12 resistance. For convenience, we used  $f_h$ ,  $f_c$ , and  $f_i$  to represent the influence caused by  
 13 hot-side, cold-side, and insulation thermal resistance, respectively. The three variables  
 14 are expressed as follows

$$15 \quad f_h = \frac{R_h}{R_t} \quad (S2)$$

$$16 \quad f_c = \frac{R_c}{R_t} \quad (S3)$$

$$17 \quad f_i = \frac{A\kappa}{A_i\kappa_i} = \frac{R_i}{R_t} \quad (S4)$$

18 where  $R_i$  and  $R_t$  are the thermal resistance of the thermoelectric leg and insulation  
 19 material, respectively. Since the filling material is generally the same height as the  
 20 thermoelectric leg,  $f_i$  not only represents  $A\kappa$  and  $A_i\kappa_i$  but also represents the ratio of  $R_i$   
 21 to  $R_t$ . Then, substitute Equations (S2), (S3), and (S4) into Equation (S1).

$$\begin{cases}
\kappa \frac{d^2 T}{dx^2} + \frac{I^2}{\sigma A^2} = 0 & (a) \\
Q_h = ST(x)I - A\kappa \left(1 + \frac{1}{f_i}\right) \frac{dT}{dx} + \frac{T(x) - T_a}{f_h R_t}, x=0 & (b) \\
ST(x)I - A\kappa \left(1 + \frac{1}{f_i}\right) \frac{dT}{dx} = \frac{T(x) - T_a}{f_c R_t}, x=h & (c)
\end{cases} \quad (S5)$$

2 To further derive, the definition of  $R_t$  and electric resistance of thermoelectric leg ( $R_e$ )  
3 need to be shown as follows

$$4 \quad R_t = \frac{h}{A\kappa} \quad (S6)$$

$$5 \quad R_e = \frac{h}{A\sigma} \quad (S7)$$

6 Then, substitute Equations (S6) and (S7) into Equation (S5).

$$\begin{cases}
T(x) = -\frac{I^2 R_e R_t}{2h^2} x^2 + C_1 x + C_2 \\
C_1 = \frac{1}{h} \frac{SIR_t \{0.5I^2 R_e R_t [1 - SIf_c R_t + 2f_c(1+1/f_i)] + T_a\} - Q_h R_t (1 - SIf_c R_t)}{SIR_t (1 - SIf_c R_t) + 1 + 1/f_i} \\
C_2 = \frac{(1+1/f_i) \{0.5I^2 R_e R_t [1 - SIf_c R_t + 2f_c(1+1/f_i)] + T_a\} + Q_h R_t [(1 - SIf_c R_t) + f_c(1+1/f_i)]}{SIR_t (1 - SIf_c R_t) + 1 + 1/f_i}
\end{cases} \quad (S8)$$

8 Therefore, the temperature difference between the two sides of the thermoelectric leg  
9 ( $\Delta T$ ) is expressed as follows

$$10 \quad \Delta T = T_h - T_c = \frac{0.5I^2 R_e R_t (1+1/f_i)(f_h - 2SIR_t f_h f_c - f_c) - SIR_t T_a (f_h + f_c) + R_t Q_h f_h (1 - SIR_t f_c)}{SIR_t (f_h - SIR_t f_h f_c - f_c) + (1/f_i + 1)(f_h - f_c) + 1} \quad (S9)$$

11 where  $T_h$  and  $T_c$  are the hot-side and cold-side temperatures of the thermoelectric leg,  
12 respectively. Since the complex expression, some methods need to be done to simplify

13 Equation (S9). Note that  $S$  is usually on the order of  $1 \times 10^{-4} \text{ V K}^{-1}$ .  $f_c$  is usually less than

14 1. Therefore, the sum term  $1 - 2SIR_t f_c$  and  $1 - SIR_t f_c$  is considered approximately equal to

15 1. This simplified approach was also used by Zhu Kang et al. in dealing with the  
16 efficiency model<sup>1,2</sup>. Therefore, Equation (S9) is abbreviated as follows

$$17 \quad \Delta T \approx \frac{0.5I^2 R_e R_t (1+1/f_i)(f_h - f_c) - SIR_t T_a (f_h + f_c) + R_t Q_h f_h (1 - SIR_t f_c)}{SIR_t (f_h - f_c) + (1/f_i + 1)(f_h - f_c) + 1} \quad (S10)$$

18 Then, to further derive, the definition of  $I$ , power ( $P$ ), efficiency ( $\eta$ ), the ratio of load  
19 resistance ( $R_L$ ) to  $R_e$  ( $m$ ), figure-of-merit ( $Z$ ) need to be shown as follows

$$I = \frac{S(T_h - T_c)}{R_e + R_L} \quad (S11)$$

$$P = I^2 R_L \quad (S12)$$

$$\eta = \frac{P}{Q_h} \quad (S13)$$

$$m = \frac{R_L}{R_e} \quad (S14)$$

$$Z = \frac{S^2 \sigma}{\kappa} = \frac{PF}{\kappa} \quad (S15)$$

where  $PF$  is the power factor. Substitute Equations (S11), (S12), (S13), (S14), and (S15) into Equation (S10) to obtain efficiency expression.

$$\begin{cases} \eta = \frac{P}{Q_h} = \frac{2ZR_t Q_h f_h^2 m}{a_1^2 + a_2 + a_1 \sqrt{a_1^2 + 2a_2}} & (a) \\ a_1 = [(1/f_i + 1)(f_h + f_c) + 1](m + 1) + Z[T_a(f_h + f_c) + R_t Q_h f_h f_c] & (b) \\ a_2 = ZR_t Q_h f_h (f_h - f_c)(2m + 1 - 1/f_i) & (c) \end{cases} \quad (S16)$$

By numerical analysis, we found the  $a_1^2 + a_2 \approx a_1(a_1^2 + 2a_2)^{0.5}$ . Figure S8 shows the ratio of  $a_1^2 + a_2$  to  $a_1(a_1^2 + 2a_2)^{0.5}$  equals to 1 with the range of  $q_h \cdot h = 1-1000 \text{ W m}^{-1}$ ,  $T_a = 300-450 \text{ K}$ ,  $f_h = 1-1000$ ,  $f_c = 0.01-10$ ,  $f_i = 0.1-100$ , and  $m = 0.4-10$ . Besides, the properties of six thermoelectric materials at 300 K are also used to verify this conclusion. The chosen thermoelectric materials are p-SiGe<sup>3</sup>, p-MgAgSb<sup>4</sup>, p-half-Heusler<sup>5</sup>, n-CoSb<sup>6</sup>, n-MgSnGe<sup>7</sup> and n-BaGaSn<sup>8</sup>, respectively. Detailed material properties are shown in Figure S1. Therefore, Equation (S16) is abbreviated as follows

$$\eta = \frac{ZR_t Q_h f_h^2 m}{a_1^2 + a_2} \quad (S17)$$

Then, solve  $\partial \eta / \partial m = 0$ , neglecting the meaningless negative solution to get the optimal value of  $m$ .

$$m_{\text{opt}} = \frac{\sqrt{\{(1/f_i + 1)(f_h + f_c) + 1 + Z[T_a(f_h + f_c) + R_t Q_h f_h f_c]\}^2 + ZR_t Q_h f_h (f_h - f_c)(1 - 1/f_i)}}{(1/f_i + 1)(f_h + f_c) + 1} \quad (S18)$$

We numerically analyzed the value of  $[(1/f_i + 1)(f_h + f_c) + 1 + Z[T_a(f_h + f_c) + R_t Q_h f_h f_c]]^2$  and  $ZR_t Q_h f_h (f_h - f_c)(1 - 1/f_i)$  within the range of  $q_h \cdot h = 1-1000 \text{ W m}^{-1}$ ,  $T_a = 300-450 \text{ K}$ ,  $f_h = 1-1000$ ,  $f_c = 0.01-10$ ,  $f_i = 0.1-100$ . Figure S9 shows that  $[(1/f_i + 1)(f_h + f_c) + 1 + Z[T_a(f_h + f_c) + R_t Q_h f_h f_c]]^2$  is greater than  $ZR_t Q_h f_h (f_h - f_c)(1 - 1/f_i)$  within the investigated range. Therefore, Equation

1 (S18) is abbreviated as follows

$$2 \quad m_{\text{opt}} \approx 1 + \frac{Z[T_a(f_h + f_c) + R_t Q_h f_h f_c]}{(1/f_i + 1)(f_h + f_c) + 1} \quad (\text{S19})$$

3 Substitute Equation (S19) into Equation (S16) to get our final model.

$$4 \quad \left\{ \begin{array}{l} \eta_{\text{max}} = \frac{1}{g} \frac{\sqrt{g \cdot ZQ + 1} - 1}{\sqrt{g \cdot ZQ + 1} + 1} \quad (a) \\ m_{\text{opt}} = 1 + \frac{Z[T_a(f_h + f_c) + R_t Q_h f_h f_c]}{(1/f_i + 1)(f_h + f_c) + 1} \quad (b) \\ g = \frac{f_h - f_c}{f_h} \left( 1 + \frac{1 - 1/f_i}{2m_{\text{opt}}} \right) \quad (c) \\ ZQ = \frac{ZR_t Q_h f_h^2 [(1/f_i + 1)(f_h + f_c) + 1]^{-1}}{(1/f_i + 1)(f_h + f_c) + 1 + Z[T_a(f_h + f_c) + R_t Q_h f_h f_c]} \quad (d) \end{array} \right. \quad (\text{S20})$$

5  $Q_h$  is expressed as follows

$$6 \quad Q_h = q_h A \quad (\text{S21})$$

7 where  $q_h$  is the heat flux. Therefore, by substituting (S21) into Equation (S20), we got  
8 another expression of our model.

$$9 \quad \left\{ \begin{array}{l} \eta_{\text{max}} = \frac{1}{g} \frac{\sqrt{g \cdot ZQ + 1} - 1}{\sqrt{g \cdot ZQ + 1} + 1} \quad (a) \\ m_{\text{opt}} = 1 + \frac{PFf_i [\kappa T_a (f_h + f_c) + q_h h f_h f_c]}{\kappa^2 (1 + f_i)(f_h + f_c) + \kappa^2 f_i} \quad (b) \\ g = \frac{f_h - f_c}{f_h} \left( 1 + \frac{f_i - 1}{2m_{\text{opt}} f_i} \right) \quad (c) \\ ZQ = \frac{PFq_h h f_h^2 f_i^2 [(1 + f_i)(f_h + f_c) + f_i]^{-1}}{\kappa^2 (1 + f_i)(f_h + f_c) + \kappa^2 f_i + PFf_i [\kappa T_a (f_h + f_c) + q_h h f_h f_c]} \quad (d) \end{array} \right. \quad (\text{S22})$$

10 Note that  $q_h$  and  $h$  always exist simultaneously in Equation (S22). Therefore, we  
11 verified whether  $q_h$  and  $h$  have an equal effect in the governing Equation (S1). We  
12 selected the properties of p-MgAgSb<sup>4</sup> at 300 K and compared the maximum efficiency  
13 ( $\eta_{\text{max,num}}$ ) calculated by Equation (S1) with  $q_h$  when the product of  $q_h$  and  $h$  is 0.1, 1,  
14 10, 100, and 1000 W m<sup>-1</sup>, respectively, under  $T_a=300$  K,  $f_c=0.1$ ,  $f_h=10$ , and  $f_i=10$ . The  
15 variation of  $\eta_{\text{max,num}}$  with  $q_h$  is shown in Figure S10. It can be seen that when the product  
16 of  $q_h$  and  $h$  is the same,  $\eta_{\text{max,num}}$  remains unchanged, therefore,  $q_h$  and  $h$  have a

1 equivalence effect. From the view of heat transfer,  $\Delta T = Q_h R_t = q_h h / \kappa$ .  $\Delta T$  is directly  
 2 related to efficiency. Therefore, if the product of  $q_h$  and  $h$  remains constant,  $\Delta T$  and  
 3 efficiency remain unchanged.

4 To find suitable thermoelectric materials for STEGs, we compare  $ZQ$  of different  
 5 materials<sup>3, 4, 6, 8-16</sup> under different  $q_h h$  when  $T_a = 300$  K,  $f_h \gg 1$ ,  $f_c \ll 1$ , and  $f_i \gg 1$ . We  
 6 used an iteration method that was used in our previous work<sup>2</sup> to accurately calculate.  
 7 The detailed process is shown in Figure S11. Firstly, we assume the real hot-side  
 8 temperature ( $T_{h,real}$ ) is in the range of  $T_a - T_a + \Delta T$ . Secondly, we use the integral average  
 9 properties between the range of  $T_a - T_a + \Delta T$  to get  $T_{h,eq,1}$ . The detailed derivation process  
 10 of  $T_{h,eq}$  is shown in previous work<sup>2</sup>. Thirdly, we judged whether  $T_{h,eq,1}$  is in the range of  
 11  $T_a - T_a + \Delta T$ . If not, we further assume the  $T_{h,real}$  is in the range of  $T_a - T_a + 2\Delta T$  and solve  
 12  $T_{h,eq,2}$  again. Then we continue to judge whether  $T_{h,eq,2}$  is in the range of  $T_a - T_a + 2\Delta T$ , and  
 13 circulate the above process until  $T_{h,eq,N}$  is in the range of  $T_a - T_a + N\Delta T$  (Each cycle  $N$   
 14 increases by 1.). If yes, we judge whether this  $T_{h,eq,1}$  is within the temperature range ( $T_a$ ,  
 15  $T_{up}$ ) shown in the references, where  $T_{up}$  is the upper temperature limit. If not, this value  
 16 cannot be used, and we should move on to the next material calculation. If yes, we think  
 17  $T_{h,eq,1}$  can be regarded as the approximate value of  $T_{h,real}$ . Then, we can use  $T_{h,real}$  as the  
 18 upper-temperature limit to calculate  $S_{int}$ ,  $\sigma_{int}$ ,  $\kappa_{int}$ , and  $ZQ$ .

19 Besides, we also provide a mathematical expression of the upper limited  $q_h h$  by  
 20 utilizing Equation (S16) in the previous work<sup>2</sup>. The expression of up-limited  $q_h h$  is  
 21 shown as following

$$22 \quad (q_h h)_{lim} = (T_m - T_a) \kappa \left[ 1 + Z \frac{(1.5 + ZT_a)T_m + 0.5T_a}{(2 + ZT_a)^2} \right] \quad (S23)$$

23 where  $T_m$  is the melting temperature. We compare  $(q_h h)_{lim}$  of different materials<sup>3-6, 8-16</sup>  
 24 when  $T_a = 300$  K,  $f_h \gg 1$ ,  $f_c \ll 1$ , and  $f_i \gg 1$ . The integral material properties in references  
 25 are used to calculate. Note that we approximately consider the maximum temperature  
 26 in experimental testing as the melting point due to the lack of material property data at  
 27 the melting point. Results are shown in Figure S12. Within, n-SiGe owns the highest

- 1  $(q_h h)_{\text{lim}} = 5495 \text{ W m}^{-1}$ . However, the reported highest  $q_h h$  of STEGs is  $2163 \text{ W m}^{-1}$ .<sup>17</sup>
- 2 Therefore, in Figure 3b, we only compared  $ZQ$  within  $q_h h = 0\text{-}2000 \text{ W m}^{-1}$ .

## 1 **Note S2. Aerogel properties**

2 The material properties are shown in Figure S3 (b-d). It can be seen that in the solar  
3 spectrum, both samples have high light transmittances 91% (aerogel) and 87% (glass)  
4 respectively when the thickness of silica aerogel and commercial glass is 1.1 mm. The  
5 transmittance of aerogel between 0.5  $\mu\text{m}$  and 1.8  $\mu\text{m}$  is higher than that of commercial  
6 glass. As can be seen from Figure S3c, the transmittance of aerogel increases from 79%  
7 to 91% with the increase in catalyst dose. The thermal conductivity shows the same  
8 trend, from 34  $\text{mW m}^{-1} \text{K}^{-1}$  to 47  $\text{mW m}^{-1} \text{K}^{-1}$ , which is an order of magnitude difference  
9 compared to common filling materials such as polydimethylsiloxane (250  $\text{mW m}^{-1} \text{K}^{-1}$ )  
10 <sup>1</sup>). This excellent light transmission and heat insulation properties are attributed to the  
11 internal nanoscale pores. BET surface area analysis of 4 mM samples showed that the  
12 average internal pore size of the aerogel was 13 nm (Figure S3d). For thermal properties,  
13 when the pore diameter in the solid is less than the mean free path of the gas molecules,  
14 the collision frequency between the gas molecules and the molecules that make up the  
15 pore diameter decreases, and the heat transferred through the gas molecules will  
16 decrease. Therefore, the pore size of 13 nm greatly reduces the thermal conductivity of  
17 the aerogel. For optical properties, the pores of nanoparticles inside the aerogel are  
18 similar in size to particles in the air, so it is transparent.



1 **Note S3. Model modification of heat-concentrated aerogel-encapsulated STEG**

2 Based on Equation (S22), this section revises the equations for the heat-concentrated  
 3 aerogel-encapsulated STEG (a-STEG). According to the structure of heat-concentrated  
 4 a-STEG, the variables involved in Equation (S22) ( $f_i$ ,  $f_h$ ,  $f_c$ , and  $q_h$ ) are specifically  
 5 expressed as follows

$$\begin{cases} f_h = \frac{R_h}{R_t} = \frac{h_{\text{aer}} A \kappa}{A_{\text{aer}} \kappa_{\text{aer}} h} = \frac{h_{\text{aer}} \kappa}{C_{\text{th}} h \kappa_{\text{aer}}} & (a) \\ f_i = \frac{A \kappa}{A_i \kappa_i} = \frac{\kappa}{(C_{\text{th}} - 1) \kappa_i} \approx \frac{\kappa}{C_{\text{th}} \kappa_i} & (b) \\ f_c = 0 & (c) \\ q_h = C_{\text{th}} q_s e^{-ah_{\text{aer}}} \alpha_{\text{rec}} & (d) \end{cases} \quad (S24)$$

7 where  $h_{\text{aer}}$  is the height of aerogel,  $A_{\text{aer}}$  is the area of aerogel,  $\kappa_{\text{aer}}$  is the thermal  
 8 conductivity of aerogel,  $C_{\text{th}}$  is the ratio of the area of absorber to thermoelectric leg, i.e.  
 9 heat-concentration coefficient,  $A_i$  is the area of insulation material,  $\kappa_i$  the thermal  
 10 conductivity of insulation material,  $q_s$  is the sunlight intensity,  $\alpha$  is the transmittance  
 11 coefficient, and  $\alpha_{\text{rec}}$  is the absorptivity of absorber. For heat-concentrated a-STEGs, the  
 12 area of the absorber is equal to  $A_{\text{aer}}$ . In this experiment, the cold side is controlled by a  
 13 copper plate and PID temperature controller, so the  $f_c$  of the cold side is very low.  
 14 Consider manuscript demonstrates that, within certain limits, the effect of  $f_c$  on the  
 15 efficiency is very low. Therefore, for the convenience of derivation,  $f_c$  is regarded as 0  
 16 in this experiment. Considering that  $C_{\text{th}}$  is generally much larger than 1<sup>18</sup>, an  
 17 approximation of  $f_i$  is performed to reduce the difficulty of derivation.

18 Substitute Equations (S24) into Equation (S22) to get the figure-of-merit ( $ZQ_{\text{th}}$ ) for  
 19 heat-concentrated a-STEG.

$$ZQ_{\text{th}} = \frac{\frac{PF}{\kappa_{\text{aer}}^2} \frac{h_{\text{aer}}^2}{h} \frac{q_s e^{-ah_{\text{aer}}} \alpha_{\text{rec}}}{C_{\text{th}}}}{\frac{h_{\text{aer}}}{h \kappa_{\text{aer}}} \left( \kappa_i + \frac{\kappa}{C_{\text{th}}} + \frac{PFT_a}{C_{\text{th}}} \right) + 1} \frac{1}{\frac{h_{\text{aer}}}{h \kappa_{\text{aer}}} \left( \kappa_i + \frac{\kappa}{C_{\text{th}}} \right) + 1} \quad (S25)$$

21 From the definition of  $ZQ_{\text{th}}$ , it can be seen that  $PF$ ,  $q_s$ , and  $\alpha_{\text{rec}}$  are positively  
 22 correlated with  $ZQ_{\text{th}}$ ,  $\kappa_{\text{aer}}$ ,  $\kappa_i$ ,  $\kappa$ , and  $T_a$  are negatively correlated with  $ZQ_{\text{th}}$ , and there are

1 optimal values of  $C_{th}$ ,  $h_{aer}$ , and  $h$ . In general,  $q_s$  is maintained at  $1000 \text{ W m}^{-2}$ .  $\alpha_{rec}$  changes  
2 little, and most of the blackbody coatings reach more than 0.9 absorptivity. In this paper,  
3 the graphene coating is used, with an absorptivity of 0.95. However, the optimal values  
4 of  $C_{th}$ ,  $h_{aer}$ , and  $h$  cannot be reached at the same point. Therefore, this paper considers  
5 that although the preparation of aerogel is mature, it is cumbersome, and accurate  
6 control of  $h_{aer}$  is difficult to achieve. Therefore,  $h$  is regarded as a fixed value in this  
7 section, that is, the optimal value of  $h$  relative to  $ZQ_{th}$  is not sought, but the optimal  
8 value of  $C_{th}$  and  $h_{aer}$  for  $ZQ_{th}$  is only sought. It is found that the optimal values of  $C_{th}$   
9 and  $h_{aer}$  are obtained simultaneously. The expression is as follows

$$10 \quad \left\{ \begin{array}{l} C_{th,opt} = \frac{h_{aer} \kappa (1 + ZT_a)^{0.5}}{h_{aer} \kappa_i + h \kappa_{aer}} \quad (a) \\ h_{th,opt} = \frac{h_{aer} (C_{th} \kappa_i + \kappa)^{0.5} (C_{th} \kappa_i + T_a PF + \kappa)^{0.5}}{C_{th} \kappa_{aer}} \quad (b) \end{array} \right. \quad (S26)$$

1 **Note S4. Model modification of light-concentrated aerogel-encapsulated STEG**

2 Similar to Note S3, this section revises the equations for the light-concentrated a-  
3 STEG. According to the structure of light-concentrated a-STEG, the variables involved  
4 in Equation (S22) ( $f_i, f_h, f_c$ , and  $q_h$ ) are specifically expressed as follows

$$5 \left\{ \begin{array}{l} f_h = \frac{R_h}{R_t} = \frac{h_{\text{aer}} A \kappa}{A_{\text{aer}} \kappa_{\text{aer}} h} = \frac{h_{\text{aer}} \kappa}{C_{\text{th}} h \kappa_{\text{aer}}} \quad (a) \\ f_i = \infty \quad (b) \\ f_c = 0 \quad (c) \\ q_h = C_{\text{th}} C_{\text{lt}} q_s e^{-ah_{\text{aer}}} \alpha_{\text{rec}} \tau \quad (d) \end{array} \right. \quad (S27)$$

6 where  $\tau$  is the transmittance of the lens,  $C_{\text{lt}}$  is the ratio of the area of the lens to the  
7 thermoelectric leg, i.e. light-concentrated coefficient, and  $A_{\text{rec}}$  is the area of the absorber.  
8 Note that, although this section is for light-concentrated a-STEG, in the actual  
9 production process of light-concentrated a-STEG, the area of the absorber is inevitably  
10 larger than the area of the thermoelectric leg. Therefore,  $C_{\text{th}}$  still exists. However, the  
11 size of the absorber used in this section is 4 mm × 8 mm, while the area of a single  
12 thermoelectric leg is 2 × 3.5 mm × 3.5 mm. Therefore,  $C_{\text{th}}$  is only 1.3. Within the void  
13 positions, only air acts as the medium for heat conduction. The convective heat transfer  
14 capacity of air in confined space is also limited. Therefore,  $1/f_i$  is considered to be equal  
15 to 0 during equation solving in this note.  $f_c$  is treated as equal to 0 as same with heat-  
16 concentrated a-STEG.

17 Substitute the Equation (S27) into Equation (S22), figure-of-merit ( $ZQ_{\text{lt}}$ ) suitable  
18 for light-concentrated a-STEG is obtained.

$$19 ZQ_{\text{lt}} = \frac{C_{\text{th}} C_{\text{lt}} q_s e^{-ah_{\text{aer}}} \alpha_{\text{rec}} \tau h}{\frac{\kappa^2}{PF} \left( 1 + \frac{C_{\text{th}} h \kappa_{\text{aer}}}{h_{\text{aer}} \kappa} \right) + T_a \kappa} \frac{1}{1 + \frac{C_{\text{th}} h \kappa_{\text{aer}}}{h_{\text{aer}} \kappa}} \quad (S28)$$

20  $ZQ_{\text{lt}}$  adds two additional variables  $C_{\text{lt}}$  and  $\tau$  compared with  $ZQ_{\text{th}}$ , and the remaining  
21 variables are qualitatively the same, so these remaining variables are not introduced  
22 again. To reduce light loss, a high- $\tau$  lens made of K-9 material is used in this paper. The  
23 change of  $C_{\text{lt}}$  is achieved by changing the distance between the lens and the absorber.  
24 According to the definition of Equation (S28), the three parameters of  $C_{\text{th}}$ ,  $h_{\text{aer}}$ , and  $h$

1 have optimal values relative to  $ZQ_{\text{t}}$ . However,  $C_{\text{th}}$  is a constant value in this section, so  
 2 the optimal value of  $C_{\text{th}}$  for  $ZQ_{\text{t}}$  is not discussed. Here, we try to give a clearer physical  
 3 image from the perspective of equation derivation. Fixed  $C_{\text{th}}$  finds the optimal solution  
 4 to optimize  $h$  and  $h_{\text{aer}}$ . The derived optimal value expression is as follows

$$5 \quad \left\{ \begin{array}{l} h_{\text{t,aer,opt}} = \frac{1}{\alpha} \\ h_{\text{t,opt}} = \frac{\kappa \sqrt{1 + ZT_{\text{a}}}}{C_{\text{th}} \kappa_{\text{aer}} \alpha} \end{array} \right. \quad (\text{S29})$$

6 Although these two variables all own optimal values. However, when we substituted  
 7 the physical property parameters of aerogel, the material parameters of commercial  
 8 bismuth telluride, and the system parameters to be used in this section into the  
 9 efficiency Equation (S29) for numerical verification. It is found that  $h_{\text{aer}}$  does have an  
 10 optimal value in the experimental range of this paper. But  $h$  doesn't exist. After  
 11 calculation, the optimal value of  $h$  appears to be greater than 40 mm. The ultra-high  $h$   
 12 will cause the length-diameter ratio of the thermoelectric material to be too large, which  
 13 will cause the thermoelectric material to break easily during use. Therefore, the optimal  
 14 value is difficult to achieve in practical application. Therefore,  $h$  is regarded as  
 15 positively correlated with  $ZQ_{\text{t}}$  in this paper

16 As shown in Figure S6, as the light-concentrated coefficient increases,  $\eta$  first  
 17 increases, and then decreases. This phenomenon is different from our prediction result.  
 18 This is because of the effect of radiation heat loss. The radiation heat transfer law is  
 19 expressed as follows

$$20 \quad q_{\text{rad}} = \varepsilon \delta (T_{\text{h}}^4 - T_{\text{a}}^4) \quad (\text{S30})$$

21 where  $q_{\text{rad}}$  is the radiation heat flux,  $\varepsilon$  is the emissivity of absorber coatings, and  $\delta$  is the  
 22 Stefan Boltzmann constant. When the hot-side temperature increases, the radiation  
 23 from the absorber increases. This paper uses a coating made from graphene coating.  
 24 Hence, we used the gray body assumption, which assumes that the emissivity of the  
 25 coating is equal to the absorptivity (0.95). Therefore, the radiation heat flux is calculated  
 26 as shown in

- 1 Figure S6c and d. The external radiation heat flux increases from  $80 \text{ W m}^{-2}$  to  $773 \text{ W}$
- 2  $\text{m}^{-2}$ .

## 1   **References**

- 2   1.    K. Zhu, B. Deng, P. X. Zhang, H. S. Kim, P. Jiang and W. S. Liu, *Energy Environ.*  
3        *Sci.*, 2020, **13**, 3514-3526.
- 4   2.    H. Li, Y. P. Wang, K. Zhu, Z. J. Han, X. Z. Wu, S. H. Wang, W. Q. Zhang and  
5        W. S. Liu, *Adv. Sci.*, 2023, **10**, 2303695.
- 6   3.    G. Joshi, H. Lee, Y. C. Lan, X. W. Wang, G. H. Zhu, D. Z. Wang, R. W. Gould,  
7        D. C. Cuff, M. Y. Tang, M. S. Dresselhaus, G. Chen and Z. F. Ren, *Nano Lett.*,  
8        2008, **8**, 4670-4674.
- 9   4.    H. Z. Zhao, J. H. Sui, Z. J. Tang, Y. C. Lan, Q. Jie, D. Kraemer, K. McEnaney,  
10       A. Guloy, G. Chen and Z. F. Ren, *Nano Energy*, 2014, **7**, 97-103.
- 11  5.    X. Yan, W. S. Liu, S. Chen, H. Wang, Q. Zhang, G. Chen and Z. F. Ren, *Adv.*  
12        *Energy Mater.*, 2013, **3**, 1195-1200.
- 13  6.    X. Shi, J. Yang, J. R. Salvador, M. Chi, J. Y. Cho, H. Wang, S. Bai, J. Yang, W.  
14        Zhang and L. Chen, *J. Am. Chem. Soc.*, 2011, **133**, 7837-7846.
- 15  7.    W. S. Liu, H. S. Kim, S. Chen, Q. Jie, B. Lv, M. L. Yao, Z. S. Ren, C. P. Opeil,  
16        S. Wilson, C. W. Chu and Z. F. Ren, *Proc. Natl. Acad. Sci.*, 2015, **112**, 3269-  
17        3274.
- 18  8.    Y. Saiga, B. Du, S. K. Deng, K. Kajisa and T. Takabatake, *J. Alloys Compd.*,  
19        2012, **537**, 303-307.
- 20  9.    S. I. Kim, K. H. Lee, H. A. Mun, H. S. Kim, S. W. Hwang, J. W. Roh, D. J. Yang,  
21        W. H. Shin, X. S. Li, Y. H. Lee, G. J. Snyder and S. W. Kim, *Science*, 2015, **348**,  
22        109-114.
- 23  10.   L. S. Mao, Y. N. Yin, Q. Zhang, G. Q. Liu, H. X. Wang, Z. Guo, H. Y. Hu, Y. K.  
24        Xiao, X. J. Tan and J. Jiang, *Energy Environ. Sci.*, 2020, **13**, 616-621.
- 25  11.   L. D. Zhao, G. J. Tan, S. Q. Hao, J. Q. He, Y. L. Pei, H. Chi, H. Wang, S. K.  
26        Gong, H. B. Xu, V. P. Dravid, C. Uher, G. J. Snyder, C. Wolverton and M. G.  
27        Kanatidis, *Science*, 2016, **351**, 141-144.
- 28  12.   Y. He, T. Day, T. Zhang, H. Liu, X. Shi, L. Chen and G. J. Snyder, *Adv. Mater.*,

- 1           2014, **26**, 3974-3978.
- 2   13.   M. Zhou, J. F. Li and T. Kita, *J. Am. Chem. Soc.*, 2008, **130**, 4527-4532.
- 3   14.   Q. Zhang, E. K. Chere, K. McEnaney, M. Yao, F. Cao, Y. Ni, S. Chen, C. Opeil,  
4           G. Chen and Z. Ren, *Adv. Energy Mater.*, 2015, **5**, 1401977.
- 5   15.   B. Zhu, X. X. Liu, Q. Wang, Y. Qiu, Z. Shu, Z. T. Guo, Y. Tong, J. Cui, M. Gu  
6           and J. Q. He, *Energy Environ. Sci.*, 2020, **13**, 2106-2114.
- 7   16.   B. Yu, M. Zebarjadi, H. Wang, K. Lukas, H. Wang, D. Wang, C. Opeil, M.  
8           Dresselhaus, G. Chen and Z. Ren, *Nano Lett.*, 2012, **12**, 2077-2082.
- 9   17.   D. Kraemer, Q. Jie, K. McEnaney, F. Cao, W. S. Liu, L. A. Weinstein, J. Loomis,  
10           Z. F. Ren and G. Chen, *Nat. Energy*, 2016, **1**, 16153.
- 11   18.   D. Kraemer, B. Poudel, H. P. Feng, J. C. Caylor, B. Yu, X. Yan, Y. Ma, X. Wang,  
12           D. Wang, A. Muto, K. McEnaney, M. Chiesa, Z. Ren and G. Chen, *Nat. Mater.*,  
13           2011, **10**, 532-538.
- 14

# 1 Figures

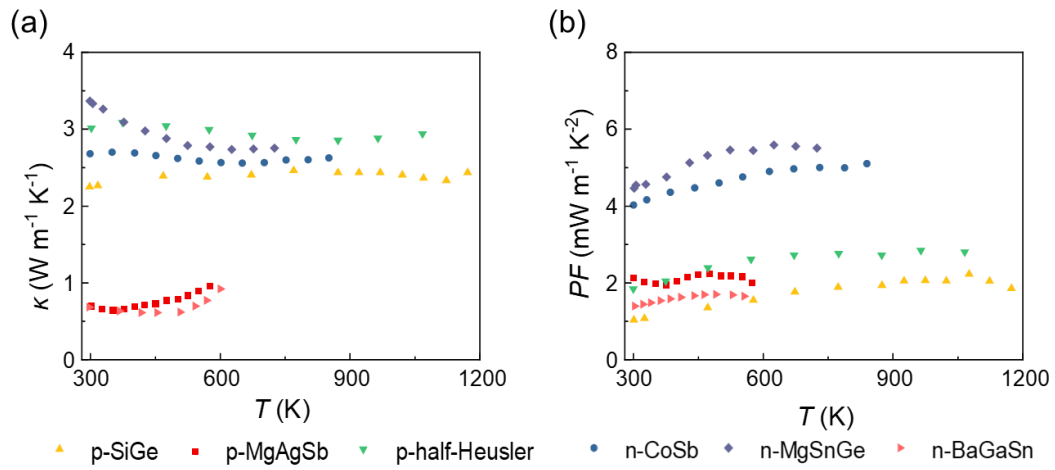

2 Figure S1 (a) The thermal conductivity ( $\kappa$ ) and (b) power factor ( $PF$ ) of six  
3 thermoelectric materials, including p-SiGe<sup>3</sup>, p-MgAgSb<sup>4</sup>, p-half-Heusler<sup>5</sup>, n-CoSb<sup>6</sup>, n-  
4 MgSnGe<sup>7</sup>, and n-BaGaSn<sup>8</sup>.



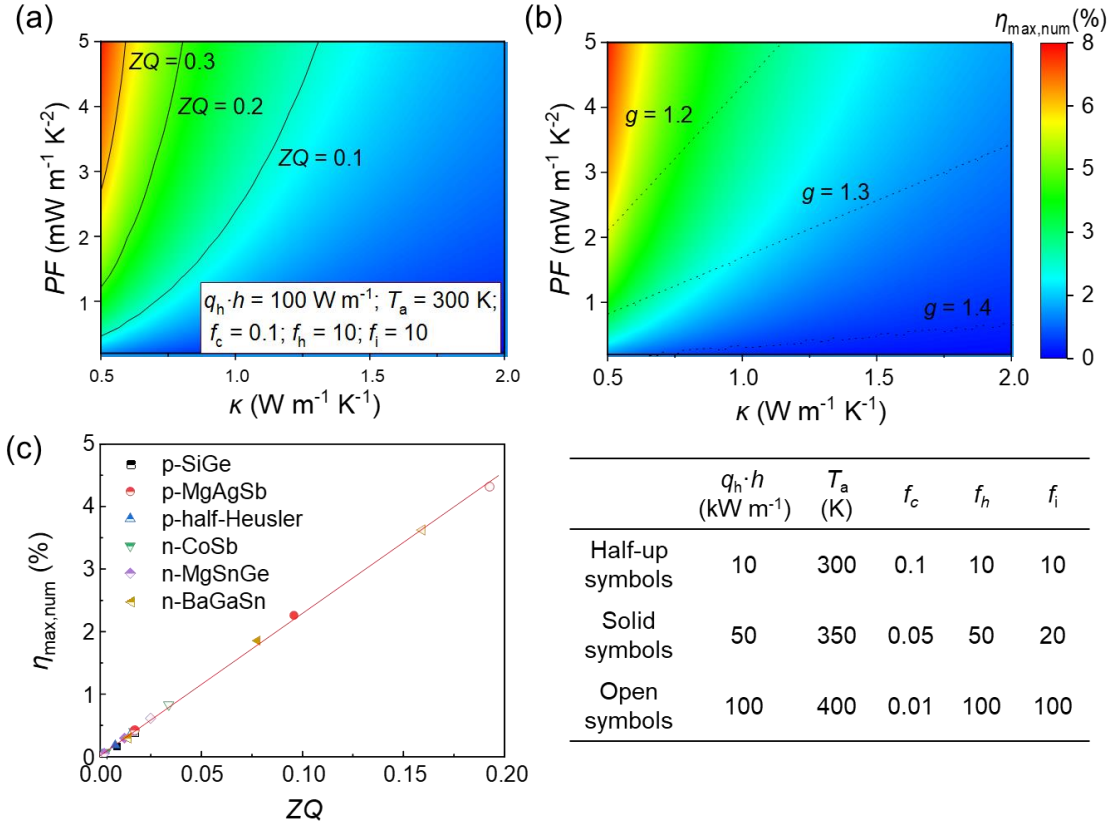

- 1 Figure S2 Two-dimensional plots of the maximum generation efficiency numerically
- 2 calculated from the governing equation ( $\eta_{\max, \text{num}}$ ) versus the power factor ( $PF$ ) and
- 3 thermal conductivity ( $\kappa$ ). Solid and dotted lines represent various contours of (a)  $ZQ$
- 4 and (b)  $g$  versus  $PF$  and  $\kappa$ , respectively.

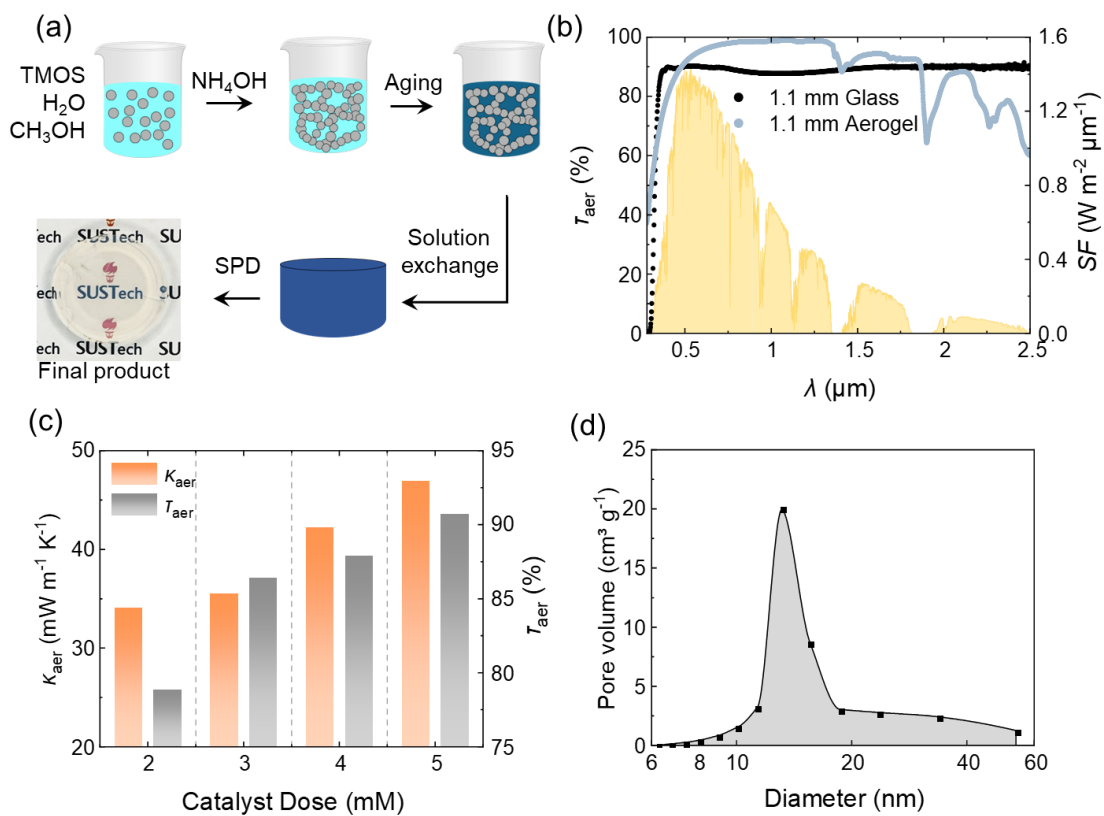

1 Figure S3 (a) Synthesis processes of aerogel. (b) Transmittance spectrum of a 1.1 mm  
 2 thick glass and aerogel sample measured by a UV–vis–NIR spectrophotometer. (c) The  
 3 thermal conductivity ( $\kappa_{\text{aer}}$ ) and transmittance ( $\tau_{\text{aer}}$ ) of aerogels with different catalyst  
 4 doses. (d) The distribution of pore volume versus diameter of aerogel.

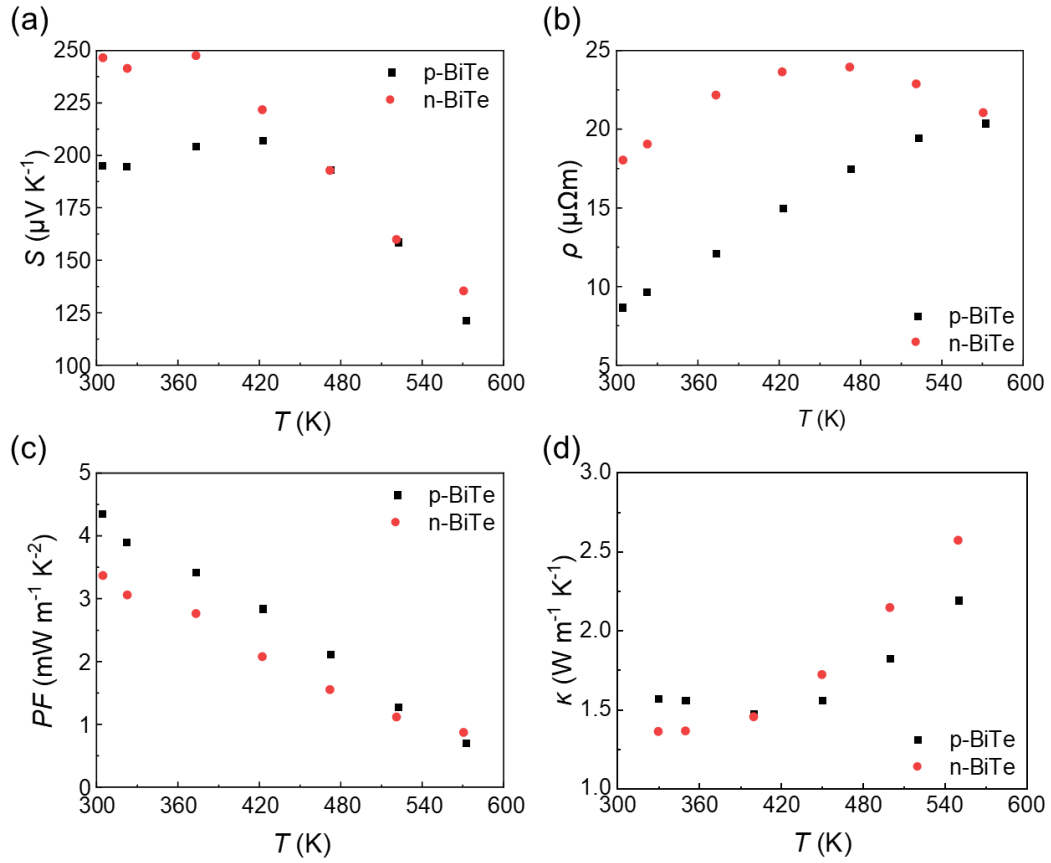

- 1 Figure S4 (a) Seebeck coefficient ( $S$ ), (b) electrical resistivity ( $\sigma$ ), (c) power factor ( $PF$ ),
- 2 and (d) thermal conductivity ( $\kappa$ ) of the commercial  $\text{Bi}_2\text{Te}_3$  used in the experiments.

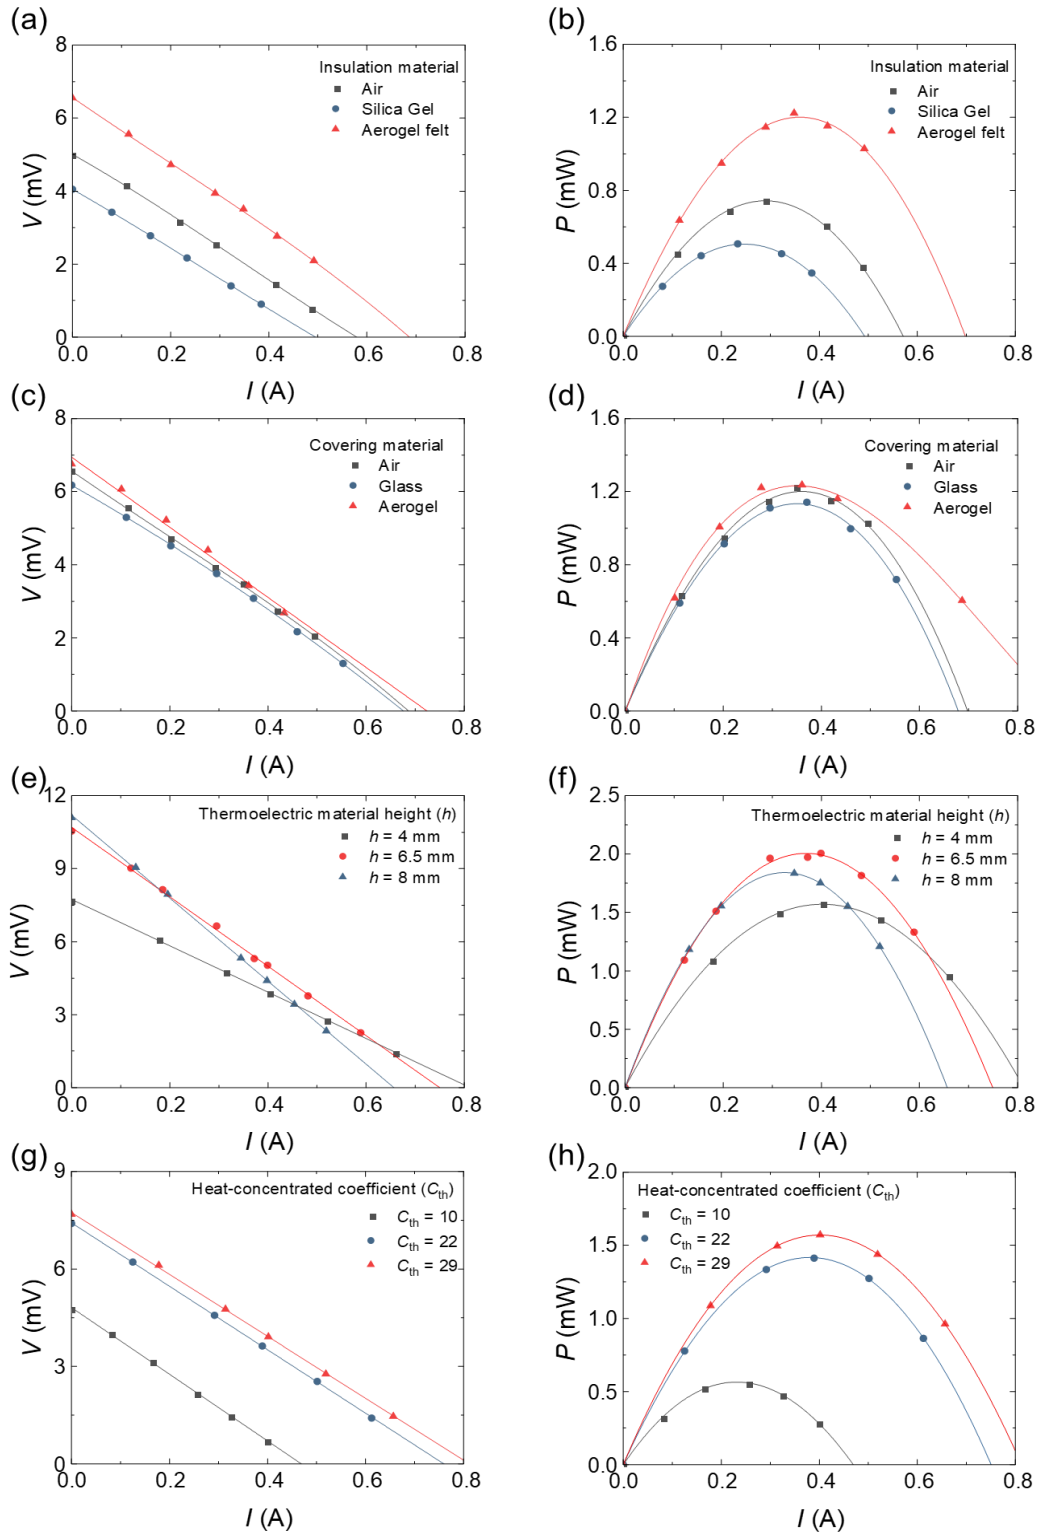

1 Figure S5 Voltage-current (V-I) and power-current (P-I) curves of light-concentrated  
 2 aerogel-encapsulated solar thermoelectric generators under different variables. (a-b)  
 3 Insulation materials. (c-d) Covering materials. (e-f) Thermoelectric material height ( $h$ ).  
 4 (g-h) Heat-concentrated coefficient ( $C_{th}$ ).

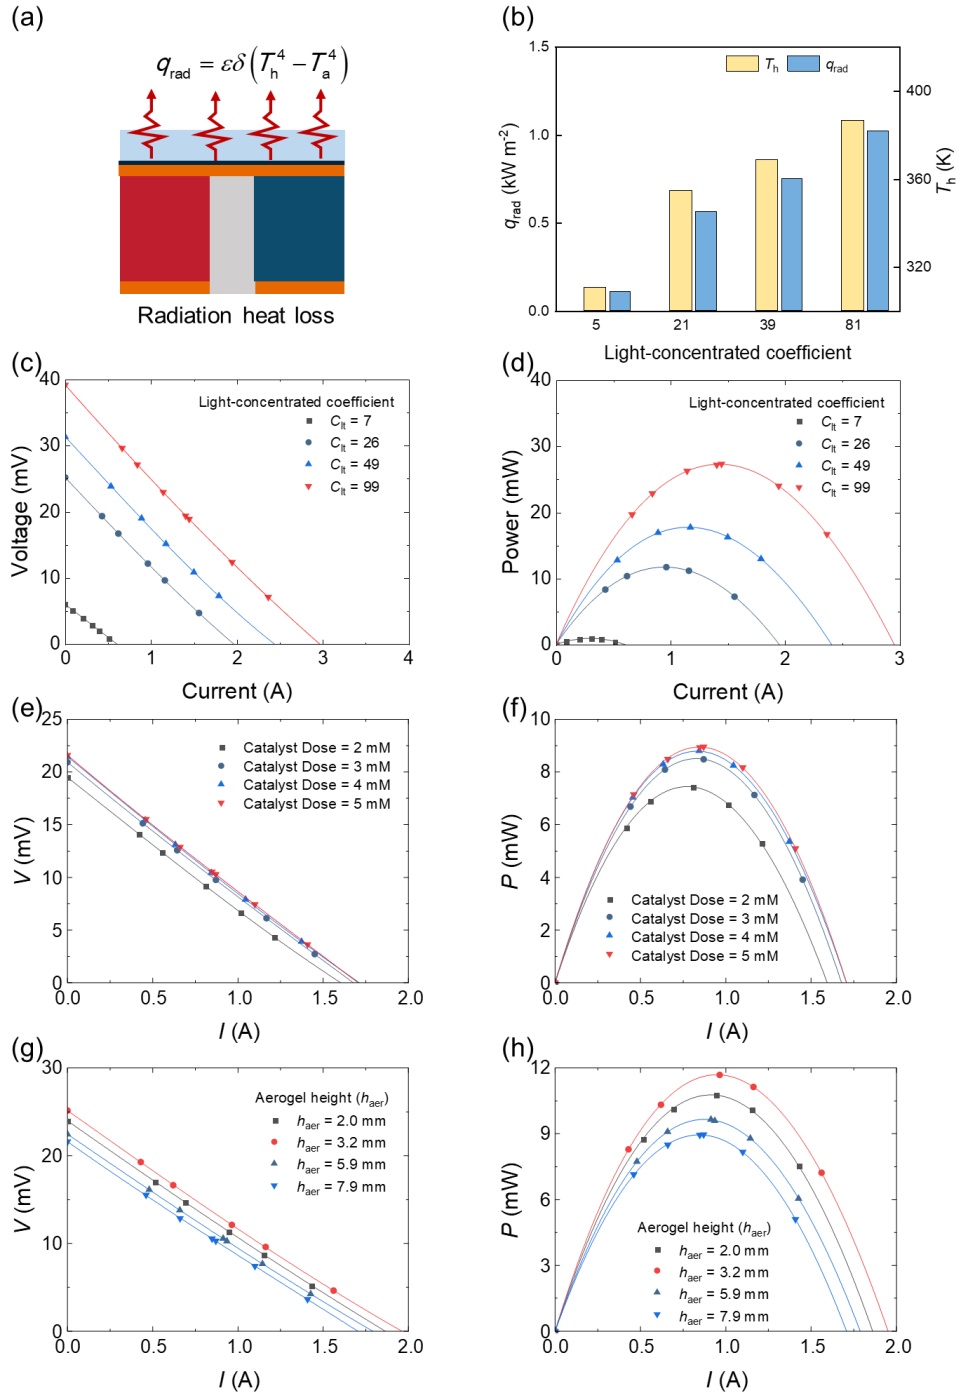

1 Figure S6 (a) The radiational heat loss from the hot-side of thermoelectric materials. (b)  
 2 The change of hot-side temperature ( $T_h$ ) and radiational heat loss ( $q_{\text{rad}}$ ) with light-  
 3 concentrated coefficient ( $C_{\text{lt}}$ ). Voltage-current (V-I) and power-current (P-I) curves of  
 4 light-concentrated aerogel-encapsulated solar thermoelectric generators under different  
 5 variables (c-d)  $C_{\text{lt}}$ , (e-f) catalyst dose, (g-h) aerogel height ( $h_{\text{aer}}$ ), (c-d) radiation heat  
 6 flux ( $q_{\text{rad}}$ ) versus  $C_{\text{lt}}$ .

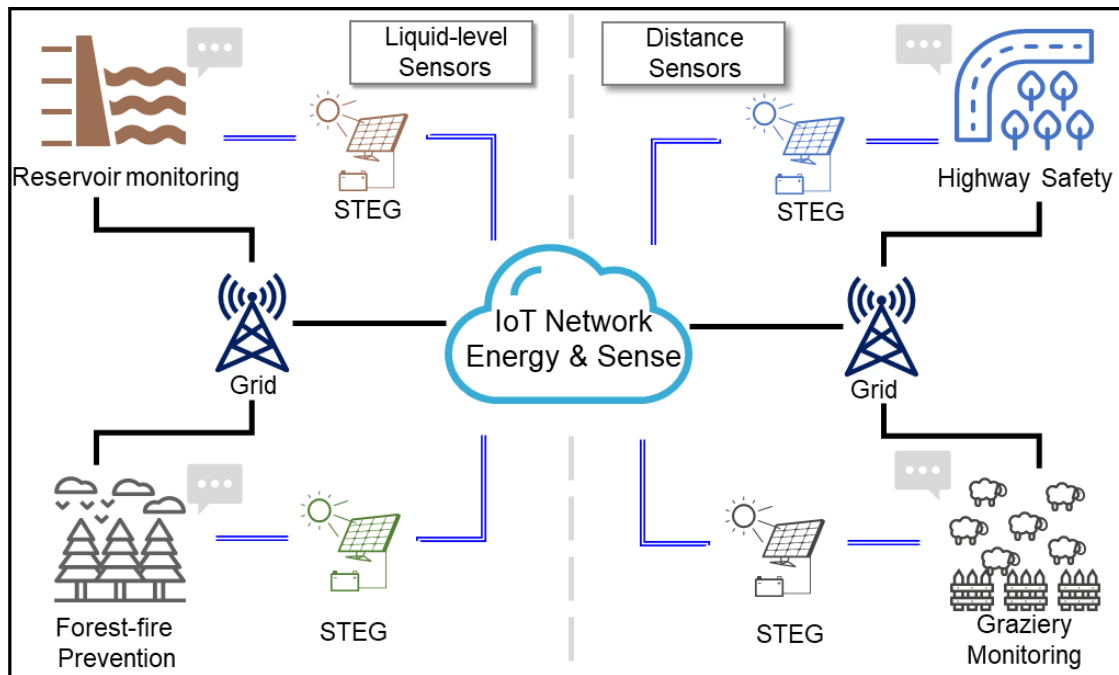

- 1 Figure S7 Schematic diagram of solar thermoelectric generators supplying energy to
- 2 Internet-of-Thing devices.

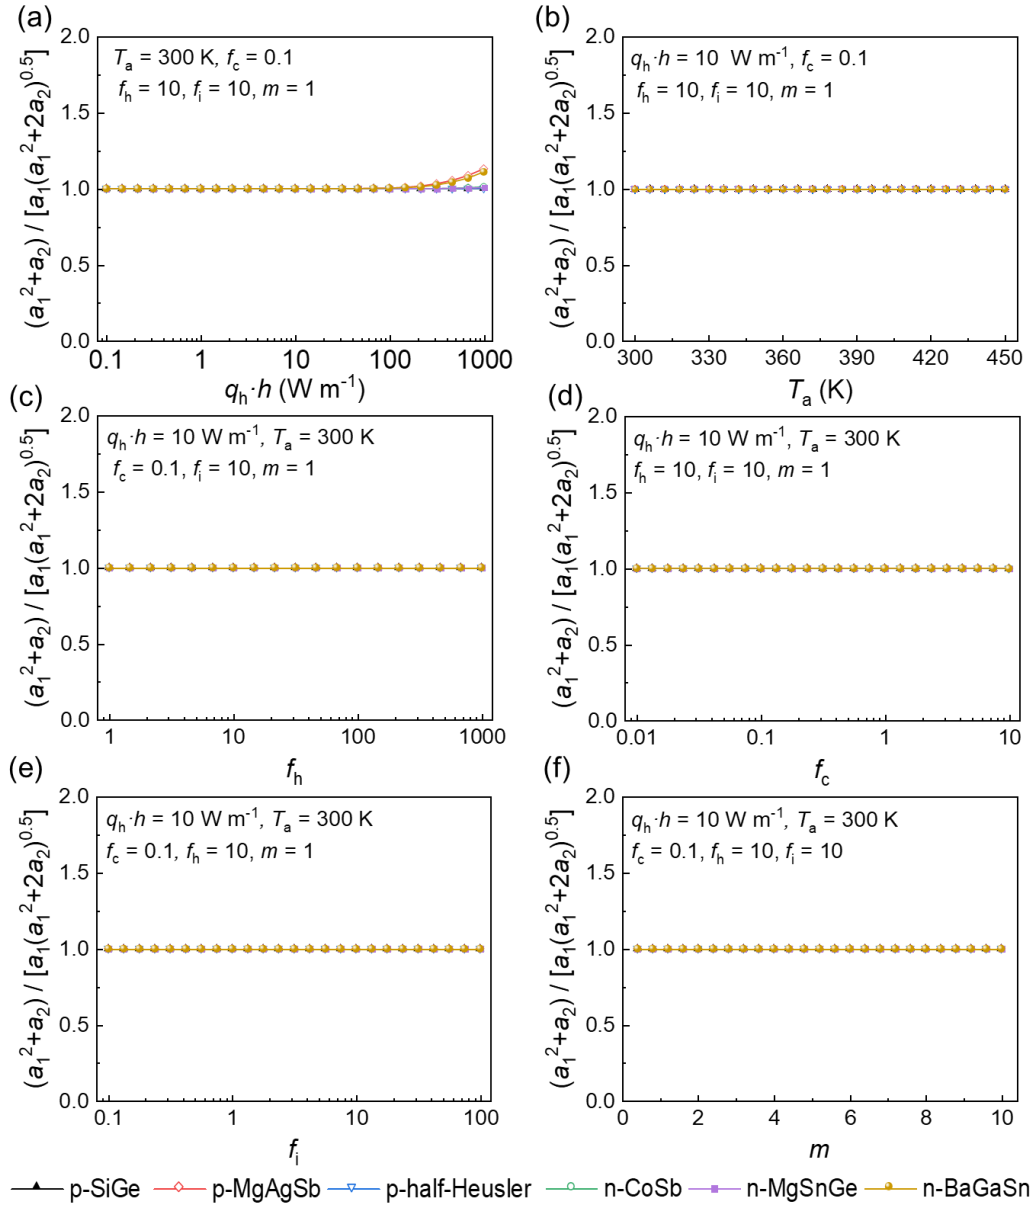

1 Figure S8 The ratio of  $a_1^2+a_2$  to  $a_1(a_1^2+2a_2)^{0.5}$  of six typical thermoelectric materials  
 2 under different (a) heat flux multiplied by height of thermoelectric leg ( $q_h h$ ), (b) ambient  
 3 temperature ( $T_a$ ), (c) ratio of hot-side to leg thermal resistance ( $f_h$ ), (d) ratio of cold-side  
 4 to leg thermal resistance ( $f_c$ ) (e) ratio of insulation material to leg thermal resistance ( $f_i$ ),  
 5 and (f) ratio of load to internal electric resistance ( $m$ ). The physical properties of  
 6 thermoelectric materials<sup>3-8</sup> at 300 K are used.

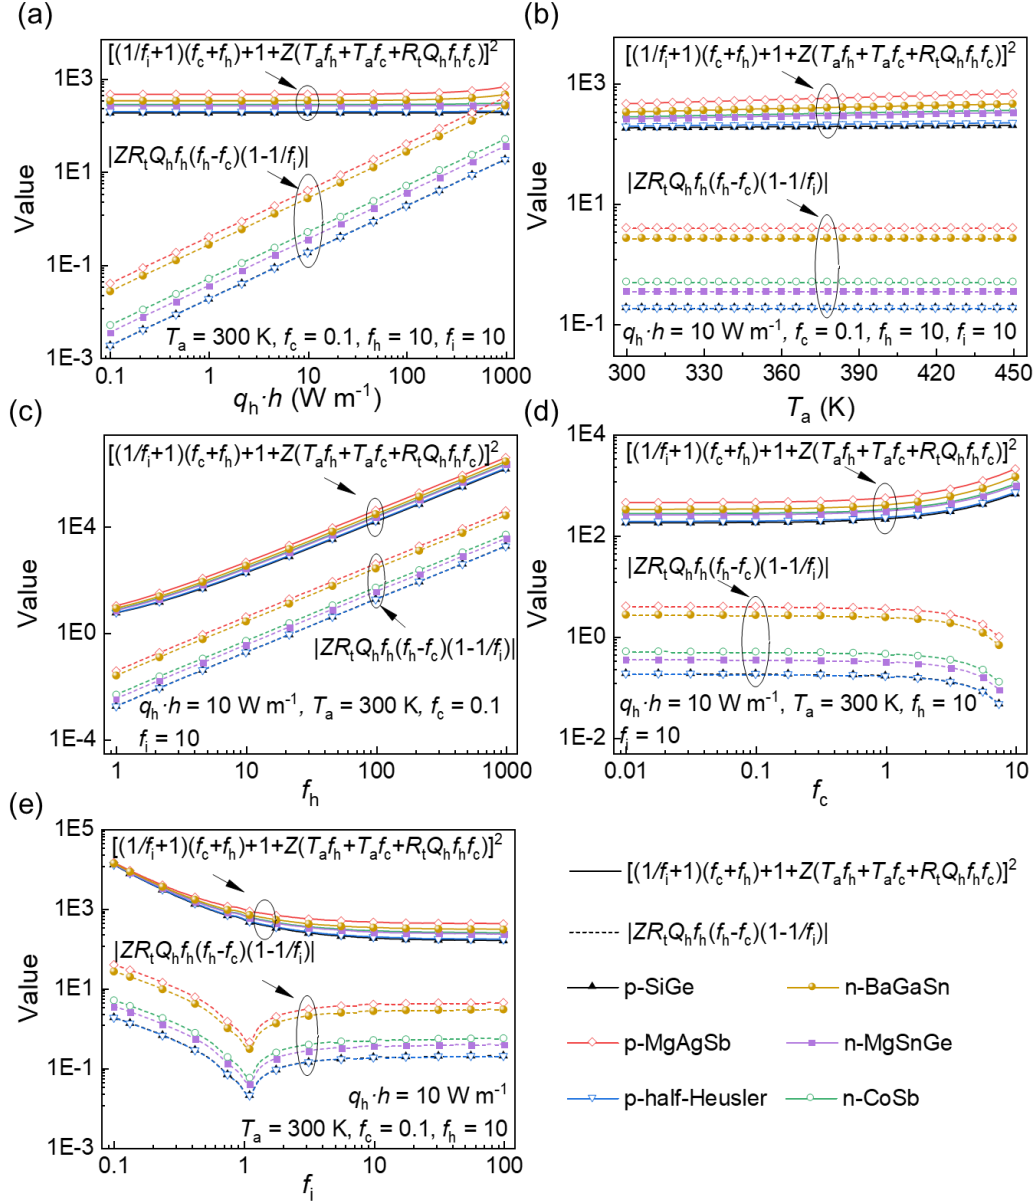

1 Figure S9 Values of  $ZR_t Q_h f_h (f_h - f_c)(1 - 1/f_i)$  and  $[(1/f_i + 1)(f_h + f_c) + 1 + Z[T_a(f_h + f_c) + R_t Q_h f_h f_c]]^2$   
 2 of six typical thermoelectric materials under different (a) heat-in flux multiplied by  
 3 height of thermoelectric leg ( $q_h h$ ), (b) ambient temperature ( $T_a$ ), (c) ratio of hot-side to  
 4 leg thermal resistance ( $f_h$ ), (d) ratio of cold-side to leg thermal resistance ( $f_c$ ), and (e)  
 5 ratio of insulation material to leg thermal resistance ( $f_i$ ). The physical properties of  
 6 thermoelectric materials<sup>3-8</sup> at 300 K are used.



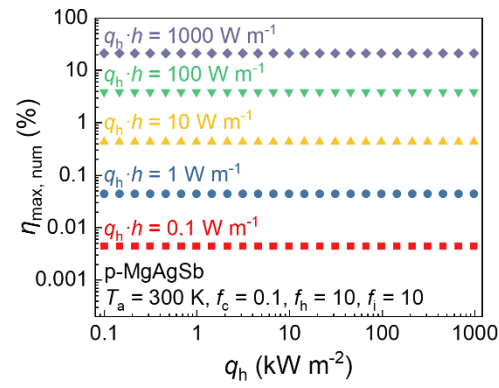

- 1 Figure S10 The maximum efficiency numerically calculated from the governing
- 2 equation ( $\eta_{\max, \text{num}}$ ) with heat flux ( $q_h$ ) under specific  $q_h$  multiplied by the height of the
- 3 thermoelectric leg ( $q_h h$ ). The physical properties of p-MgAgSb<sup>4</sup> are used.

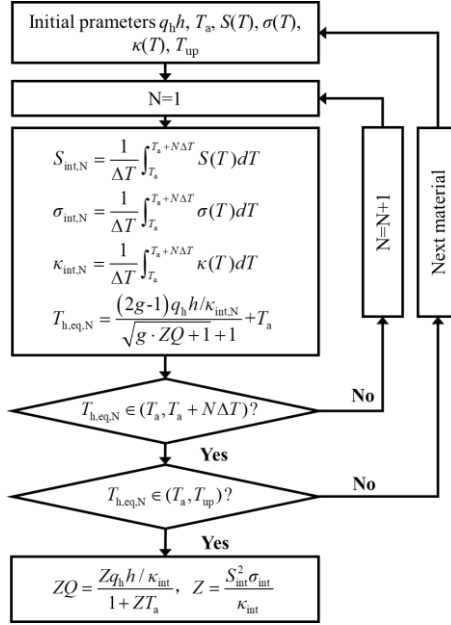

1 Figure S11 Flow chart of calculating the hot-side temperature by an iterative method.

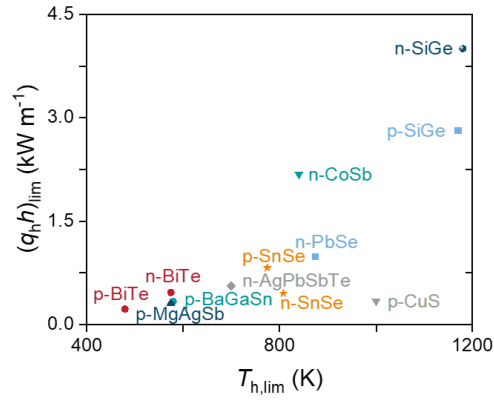

- 1 Figure S12 The up-limited values of  $q_h$  and  $T_h$  for different thermoelectric materials.
- 2 The material properties in references are used<sup>3-6, 8-16</sup>.
